# Supplementary material
Source: publisher figshare collection journal article supplement (https://frontiersin.figshare.com/ndownloader/files/22148034)
Supplement: Supplementary file 1 [file 22148034]

## Sheet: Data Table
Table S1. Project data table.
Sample Information						Physical & Chemical Characteristics							UV-Vis						Disinfection Byproducts		Nutrients								Isotope	Lignin						Optical Data and PARAFAC
GR#	Date	Sample Name ID	River Distance Upstream from Mouth (km)	Site	Season	Temp (C)	Electrical Conductivity (uS cm-1)	pH	Dissolved Oxygen (%)	Dissolved Oxygen (mg L-1)	Total Suspended Solids (mg L-1)	DOC	SUVA254	UV254	ɑ350	ɑ440	S275-295	S300-350	STHMFP (mmol mol C-1)	TTHMFP (ug L-1)	NH4 (mg L-1)	NO3 (mg L-1)	TDN (mg L-1)	DON (mg L-1)	TN	PO4-P	TDP	TP	18O-water (per mil)	λ8 (mg 100 mg OC-1)	Σ8 (ug L-1)	S:V	C:V	(Ad:Al)v	(Ad:Al)s	fDOM	FI	Total EEM Response	EEMDOC	PARAFAC Component 1	PARAFAC Component 2	PARAFAC Component 3	PARAFAC Component 4	PARAFAC Component 5
gr05396	2006-03-09	Chick @ 29	31.1	CH0	Winter	9.65	754	8.18	94.8	10.76	32.3842	1.991	3.092	0.0615618	0.0150143	0.00350671	-0.0165921	-0.0150514	10.52	236.96	0.005	0.0798338	0.319855	0.235021	0.362427	0.0445938	0.0347751	0.0197751	-7.28484	0.632588	16.1405	1.05997	0.572416	2.97008	1.72325	0.302654	1.40436	1253.49	629.578	5.66937	4.66666	4.10329	0.902307	0
gr05395	2006-03-09	Walnut @ Buckeye	20.5	CH1	Winter	10.03	737	7.92	92.1	10.37	28.89	2.278	2.92948	0.0667336	0.0154321	0.00285567	-0.0165576	-0.0170832	10.38	262.46	0.005	0.19	0.383712	0.188712	0.49014	0.0602958	0.0489083	0.0927965	-7.56809	0.620687	18.2017	0.959	0.45376	1.98929	1.33329	0.359357	1.42984	1451.34	637.111	6.44093	5.69952	4.59298	0.881899	0
gr05401	2006-03-09	DS @ 95	12.6	CH2	Winter	12.77	605	7.88	89.3	9.44	189.161	3.521	3.78566	0.133293	0.0352591	0.00820765	-0.0142945	-0.0162398	9.71	359.7	0.0511375	0.62	1.04357	0.37243	1.38414	0.0759979	0.0748191	0.224706	-6.60211	1.929	80.7666	1.43143	0.972998	2.90278	1.8822	0.471414	1.39327	2072.8	588.695	8.64355	7.72262	6.19374	1.77657	0.64682
gr05408	2006-03-09	DS @ 98	5.1	CH4	Winter	11.93	573	7.9	90.7	9.78	154.077	4.283	3.50561	0.150145	0.0399666	0.0103887	-0.0141417	-0.0151857	9.71	431.96	0.055094	0.648513	1.04357	0.339961	1.38414	0.0807085	0.0818857	0.224706	-6.8002	1.60033	68.5478	1.37786	0.815508	1.15051	1.04865	0.503838	1.37753	2251.32	525.641	9.27335	8.23115	6.55209	1.70926	1.30348
gr05398	2006-03-09	Cotton @ YLC	35.2	CO0	Winter	10.2	741	8.29	95	10.66	48.32	2.072	2.37385	0.0491863	0.01047	0.00173833	-0.0154166	-0.0161759	9.16	217.26	0.005	0.0360892	0.277284	0.236195	0.29857	0.0414534	0.0371307	0.0574636	-8.28399	0.0987893	2.57558	1.12722	0.575297	2.7475	1.95017	0.279383	1.43978	1119.84	540.463	5.20554	4.26548	3.63931	0.679332	0
gr05399	2006-03-09	Parker @ 23	36.6	PA0	Winter	11.31	722	8.21	95.3	10.41	6.505	3.926	3.05923	0.120105	0.0268796	0.00473017	-0.0163306	-0.018147	10.52	438.13	0.005	0.01	0.29857	0.28357	0.29857	0.0916999	0.0983744	0.0857299	-7.65387	0.634238	32.5073	1.08903	0.307314	2.70945	1.70108	0.545783	1.38849	2289.94	583.276	9.82599	8.87635	7.10977	1.82437	0
gr05397	2006-03-09	USS @ 88	26.3	USS1	Winter	10.96	535	7.88	85.7	9.43	42.8	4.963	4.03751	0.200382	0.0510319	0.0108123	-0.0145026	-0.017434	11.97	604.42	0.0194857	0.134514	0.766854	0.612854	0.78814	0.119964	0.126641	0.168173	-7.75164	1.35461	82.2463	1.26838	0.501195	1.95833	1.50264	0.749502	1.37107	3254.15	655.682	13.402	12.7817	9.62132	2.46373	0.732842
gr05400	2006-03-09	USS @ 91B	20.1	USS2	Winter	15.17	588	7.86	90.9	9.12	35.0545	3.25	3.31917	0.107873	0.0266076	0.00575006	-0.0142742	-0.0169856	10.47	360	0.030366	2.37	2.87413	0.473768	3.00185	0.069717	0.0724636	0.10693	-5.88843	0.980276	39.6238	1.41883	0.563564	2.87214	2.10383	0.43201	1.395	1843.96	567.371	7.81597	6.68662	5.8656	1.82656	0.0949215
gr05402	2006-03-09	USS @ 96	10.5	USS4	Winter	15.09	625	7.84	92.7	9.33	58.0617	3.927	3.37686	0.132609	0.0340875	0.0071821	-0.0138483	-0.0172019	9.6	397.63	0.105539	2.40923	2.95928	0.444507	3.25728	0.0869893	0.0842412	0.177595	-5.38965	0.104574	4.10696	0.621913	0.119506	5.72744	1.45458	0.485709	1.40444	2137.78	544.381	8.96941	7.76057	6.62587	2.33942	0.253888
gr05403	2006-03-09	WS @ 23	30.7	WS1	Winter	18.15	638	7.66	74.6	7.02	5.21333	0.762	2.6769	0.020398	0.00431644	0.000714413	-0.0135616	-0.0115615	9.32	96.7	0.0254204	4.99016	5.34327	0.327692	5.32198	0.122	0.108	0.095	-5.18698	0.190119	1.44883	0.953483	0	3.15816	1.81402	0.0758581	1.57076	287.66	377.507	1.47337	0.950932	1.22685	0.263975	0
gr05404	2006-03-09	WS @ 93	16.2	WS3	Winter	13.31	744	7.97	98.4	10.28	216.51	2.049	2.74262	0.0561963	0.0116284	0.00209985	-0.01671	-0.0158798	10.08	236.66	0.0145401	1.33749	2.53356	1.18153	2.61871	0.076	0.0583304	0.151685	-6.90811	0.628081	12.8705	2.20837	0.106075	1.30211	0.800032	0.275699	1.44357	1142.05	557.372	5.27151	4.32158	3.73568	0.72882	0
gr05409	2006-03-09	WS @ 98	5.1	WS5	Winter	14.91	659	8.03	94.6	9.65	104.049	3.963	3.12609	0.123887	0.0324302	0.00924004	-0.0146877	-0.0143608	8.88	375.29	0.063996	2.36549	2.87413	0.444652	3.10828	0.0901297	0.131352	0.219995	-5.78305	1.29009	51.1304	1.26772	0.606685	1.223	1.01242	0.430576	1.40793	1940.26	489.594	8.27276	6.63381	5.84507	1.92985	0.885361
gr05407	2006-03-09	WS @ Tracks	0	WS6	Winter	12.91	623	7.83	91.8	9.68	118.237	3.547	3.66906	0.130141	0.0333113	0.00770179	-0.0142573	-0.016199	10.52	393.37	0.0669634	1.93898	2.46971	0.463766	2.78899	0.0916999	0.0913078	0.222351	-5.97519	1.19899	50.0434	1.51632	0.89769	1.6447	1.80317	0.478572	1.40489	2129.14	600.266	9.02057	7.80246	6.39422	1.87738	0.615126
gr05630	2006-05-10	Chick @ 29	31.1	CH0	Spring	24.19	1002	8.17	120.8	10.1	1.08034	1.797	2.50508	0.0450163	0.0101221	0.00216276	-0.0159721	-0.0147458	9.24	240.61	0.005	0.01	0.111696	0.0966963	0.116892	0.0157143	0.0229679	0.027555	-6.94462	0.437049	7.85442	0.873903	0.29013	0.729869	1.1305	0.220961	1.39672	962.461	535.593	4.40899	3.52578	2.99107	0.948027	0
gr05628	2006-05-10	Walnut @ Buckeye	20.5	CH1	Spring	21.75	621	8.34	105.3	9.23	32.6923	2.008	2.56313	0.0514677	0.0109933	0.00270975	-0.0169773	-0.0140508	8.05	191.34	0.005	0.310436	0.462486	0.14705	0.542957	0.0171429	0.0413165	0.0642523	-7.78801	0.640742	12.8672	1.0969	0.3834	1.78154	1.42395	0.174591	1.38716	800.187	398.499	3.53973	2.90533	2.44558	1.10648	0
gr05627	2006-05-10	DS @ 95	12.6	CH2	Spring	20.33	601	8.23	90	8.11	107.444	1.893	3.13537	0.0593526	0.0131114	0.00332507	-0.0163865	-0.0138916	8.34	183.71	0.005	0.413914	0.587767	0.168853	0.768521	0.0385714	0.0367294	0.155995	-7.00646	0.851389	16.1181	1.04708	0.535981	1.27107	1.20615	0.194134	1.36484	912.29	481.928	3.81726	3.42071	2.71127	1.23182	0.0270463
gr05625	2006-05-10	DS @ 98	5.1	CH4	Spring	19.52	587	8.02	84.8	7.78	114.781	2.614	2.90855	0.0760294	0.018577	0.0045354	-0.0156916	-0.0146743	8.41	244.84	0.0440299	0.534639	0.963613	0.384944	1.19459	0.06	0.0780138	0.185812	-6.36683	0.788477	20.6125	1.08286	0.593862	1.48248	1.27571	0.268337	1.26768	1245.68	476.541	4.92946	4.67096	3.68614	1.70367	0.12187
gr05632	2006-05-10	Cotton @ YLC	35.2	CO0	Spring	21.75	988	8.26	106	9.28	7.02797	2.003	2.03709	0.040803	0.00880956	0.00176593	-0.0177345	-0.0153351	7.34	210.6	0.005	0.01	0.312147	0.297147	0.392581	0.0242857	0.02296	0.0298486	-7.20644							0.210512	1.34921	1022.42	510.442	5.50165	3.00034	3.51522	0.87588	0
gr05631	2006-05-10	USS @ 88	26.3	USS1	Spring	21.44	580	8.24	101.1	8.92	23.28	1.836	2.53112	0.0464713	0.00990591	0.00195586	-0.017958	-0.0143684	8.28	176.61	0.005	0.293189	0.512598	0.214409	0.542957	0.0157143	0.0161	0.0504908	-7.45708	0.353672	6.49396	0.739598	0.0838814	1.04648	0.908176	0.151973	1.38464	691.023	376.374	3.17576	2.4336	2.14866	0.955604	0
gr05629	2006-05-10	USS @ 91B	20.1	USS2	Spring	19.74	576	8.04	96.2	8.77	32.67	2.69	2.9626	0.0796939	0.0213878	0.00419801	-0.0150445	-0.0179482	8.89	260.96	0.0171642	0.413914	0.738106	0.307027	1.1194	0.0528571	0.0688394	0.110124	-7.47055	1.33178	35.8278	1.10214	0.673292	1.46546	1.13541	0.28832	1.36407	1325.47	492.742	5.27794	4.71632	4.22945	1.74647	0.180323
gr05626	2006-05-10	USS @ 96	10.5	USS4	Spring	20.89	676	7.84	79.1	7.04	47.08	4.151	3.46646	0.143893	0.036262	0.00735552	-0.0147645	-0.0175886	9.13	409.14	0.0761194	0.569132	1.21418	0.568925	1.26977	0.0757143	0.185812	0.215628	-5.58007	1.83359	76.1185	1.24397	0.867735	1.18379	1.16821	0.484344	1.36847	2179.1	524.958	8.71138	8.48737	6.52173	2.44101	0.125878
gr05634	2006-05-10	WS @ 23	30.7	WS1	Spring	22.9	589	7.95	135.6	11.63	5.5925	0.906	2.0563	0.0186301	0.00362855	0.00111178	-0.0107358	-0.00998836	7.19	88.1	0.005	3.81146	4.67196	0.855495	4.85373	0.06	0.0527844	0.0642523	-6.15814							0.0637695	1.52074	246.744	272.345	1.21041	0.833485	1.02115	0.331208	0
gr05635	2006-05-10	WS @ 93	16.2	WS3	Spring	25.53	716	8.52	192.2	15.63	12.585	1.869	2.53782	0.0474319	0.0109041	0.00251724	-0.0138642	-0.014649	7.54	185.62	0.0104478	3.31132	3.6697	0.347939	3.77604	0.0285714	0.0527844	0.0940688	-5.81979							0.181833	1.39644	825.349	441.599	3.72638	2.9417	2.65942	0.952391	0
gr05624	2006-05-10	WS @ 98	5.1	WS5	Spring	20.98	649	8.09	89.9	8	106.036	4.773	2.43333	0.116143	0.0368498	0.00595149	-0.0131752	-0.021413	8.04	420.58	0.0291045	1.50044	2.06609	0.536549	2.39759	0.09	0.0963624	0.22939	-4.43081	1.21688	58.0865	0.727114	0.63082	1.12633	1.24546	0.409658	1.41282	1905.38	399.2	7.12974	6.50445	6.49002	3.06152	0.183101
gr05623	2006-05-10	WS @ tracks	0	WS6	Spring	20.11	679	7.89	73.1	6.62	89.52	3.12	2.97389	0.0927854	0.0235252	0.00490824	-0.0146022	-0.0174518	8.54	296.22	0.0380597	1.65566	2.41688	0.723166	2.72341	0.0685714	0.206	0.243151	-6.20759	0.656781	24.9594	0.863193	0.656953	1.49088	1.46132	0.3629	1.35766	1658.41	531.542	6.61715	6.21278	5.15536	2.18337	0
gr05830	2006-07-26	Walnut @ Buckeye	20.5	CH1	Summer	28.53	292	7.78	92.3	7.14	55.08	2.891	2.1379	0.0618066	0.0116015	0.00204934			7.37	220.17	0.0180261	0.765204	1.1	0.31677	1.35004	0.0711897	0.0655508	0.113205	-5.73572							0.198692	1.45373	873.733	302.225	3.52645	2.73616	3.06684	1.73974	0
gr05839	2006-07-26	DS @ 98	5.1	CH4	Summer	29.51	386	7.54	79.1	6	157.057	7.568	3.02651	0.229047	0.0638368	0.0139848			7.61	584.13	0.0603876	0.926867	1.70252	0.715264	1.96224	0.225081	0.298526	0.372655	-4.41224							0.752347	1.38321	2841.48	375.46	9.00872	11.4833	9.02805	3.62452	0.437492
gr05832	2006-07-26	USS @ 88	26.3	USS1	Summer	26.98	293	7.84	98	7.82	48.1481	2.994	2.16324	0.0647675	0.012031	0.00259323			7.07	220.18	0.0189274	0.688222	1.12742	0.420275	1.35004	0.0667505	0.0637859	0.10791	-5.1048							0.199089	1.44685	863.339	288.357	3.57365	2.6864	3.09454	1.55547	0
gr05831	2006-07-26	USS @ 91B	20.1	USS2	Summer	28.04	296	7.77	95	7.41	45.4259	2.837	2.27091	0.0644256	0.0122993	0.00238448			7.71	225.42	0.0216314	0.672825	1.07177	0.377313	1.19235	0.0637911	0.0779056	0.106145	-4.1578							0.205882	1.45785	896.573	316.028	3.67657	2.86896	3.18579	1.56755	0
gr05836	2006-07-26	USS @ 96	10.5	USS4	Summer	31.99	472	7.48	57.2	4.16	39.24	12.796	2.74706	0.351514	0.0916731	0.0157019			7.69	996.6	0.281208	0.588145	2.35182	1.48247	2.75995	0.267993	0.317941	0.399129	-4.61641							1.1804	1.35672	4082.02	319.008	11.6338	17.2496	14.0656	5.19604	0
gr05844	2006-07-26	WS @ 23	30.7	WS1	Summer	28.3	369	7.7	117	9.11	22.86	2.947	2.14209	0.0631273	0.0138125	0.00341758					0.361424	1.6736	2.33327	0.298249	2.55588	0.0711897	0.0708457	0.0832005	-5.43328							0.21032	1.42247	930.925	315.889	3.47093	3.20879	2.94641	1.75501	0.0776308
gr05835	2006-07-26	WS @ 93	16.2	WS3	Summer	27.75	514	7.72	64.3	5.03	48.0784	4.884	2.55848	0.124956	0.0324383	0.00572181			7.71	394.36	0.0937359	2.22787	2.88054	0.558932	3.15881	0.18069	0.204983	0.224398	-5.20112							0.473801	1.39918	1898.73	388.765	6.59902	7.15448	6.63101	2.58448	0
gr05838	2006-07-26	WS @ 98	5.1	WS5	Summer	30.47	521	7.76	102.8	7.68	35.84	8.284	2.71243	0.224698	0.0599106	0.0116684			7.13	604.81	0.067598	1.15012	2.07355	0.855834	2.30544	0.164413	0.197923	0.261462	-3.71905							0.792047	1.39146	3009.59	363.302	9.64352	11.8098	10.153	4.05229	0.130994
gr05840	2006-07-26	WS @ tracks	0	WS6	Summer	28.49	500	7.71	83.6	6.47	86.8	7.213	2.79746	0.20178	0.0537958	0.0120792			7.37	545.63	0.0766111	1.27329	1.99007	0.640168	2.30544	0.17625	0.201453	0.293231	-3.81165	0.502488	42.9867	0.896061	0.482941	1.00527	1.08961	0.697813	1.40053	2723.52	377.585	8.79152	10.5381	8.98099	3.53188	0.504429
gr06204	2006-11-01	USS @ 96	10.5	USS4	Fall	14.28	751	8.75	135.8	13.88	4.75	3.2802	2.62902	0.0862371	0.019322	0.00434819	-0.015589	-0.0165595	7.23	275.19	0.0294118	0.976923	1.41692	0.410588	1.55538	0.15505	0.154308	0.183327										1814.4	553.136	7.2404	6.58383	5.69155	2.12856	0.64902
gr06202	2006-11-01	WS @ 23	30.7	WS1	Fall	17.03	557	8.18	98.2	9.46	30.0133	0.9069	2.23368	0.0202572	0.00452718	0.00134372	-0.00995784	-0.0125638	6.83	82.12	0.0227941	4.46154	4.55	0.0656674	4.61077	0.0668563	0.0689597	0.0945643										439.548	484.671	1.56494	1.20616	1.39001	0.596778	0
gr06203	2006-11-01	WS @ 93	16.2	WS3	Fall	17.46	638	9.26	229	21.88	17.1467	2.1698	2.44192	0.0529847	0.0125174	0.00322811	-0.0134402	-0.0146228	6.95	185.64	0.0102941	3.56154	3.93692	0.36509	4.07538	0.0025	0.0160436	0.05189										1126.65	519.24	4.13668	3.79997	3.2431	1.38003	0.474235
gr06205	2006-11-01	WS @ 98	5.1	WS5	Fall	16.81	823	8.88	152.7	14.74	14.3553	2.9342	2.57814	0.0756479	0.0172132	0.00376777	-0.0143163	-0.0163716	6.95	239.02	0.00955882	3.23077	3.60462	0.364287	3.67846	0.0483642	0.0570109	0.0774946										1436.13	489.445	5.75	4.92134	4.56071	1.66773	0.514365
gr06206	2006-11-01	WS @ tracks	0	WS6	Fall	12.17	854	8.62	70.8	7.58	11.5882	2.6327	2.52443	0.0664607	0.0142455	0.00289833	-0.0150807	-0.0160613	7.01	223.22	0.0691176	3.4	3.83538	0.366267	3.88154	0.0654339	0.0723737	0.0979782										1605.33	609.765	6.87715	5.43242	5.2994	1.99115	0.298395
